# Supplementary material for: Enhanced vapor sorption in block and random copolymer brushes
Source: Royal Society of Chemistry journal article supplement (doi:10.1039/d2sm00868h), 2022-01-01
Supplement: d2sm00868h1.pdf [file d2sm00868h1.pdf]

# Supplementary Information

## Enhanced vapor sorption in block and random copolymer brushes

Ivona Glišić, Guido C. Ritsema van Eck, Leon A. Smook, Sissi de Beer\*

*Sustainable Polymer Chemistry Group,  
Department of Molecules Materials,  
MESA+ Institute for Nanotechnology, University of Twente,  
P.O. Box 217,  
7500 AE Enschede,  
The Netherlands \**

### 1 Difference in sorption upon changing $\epsilon_{ab}$

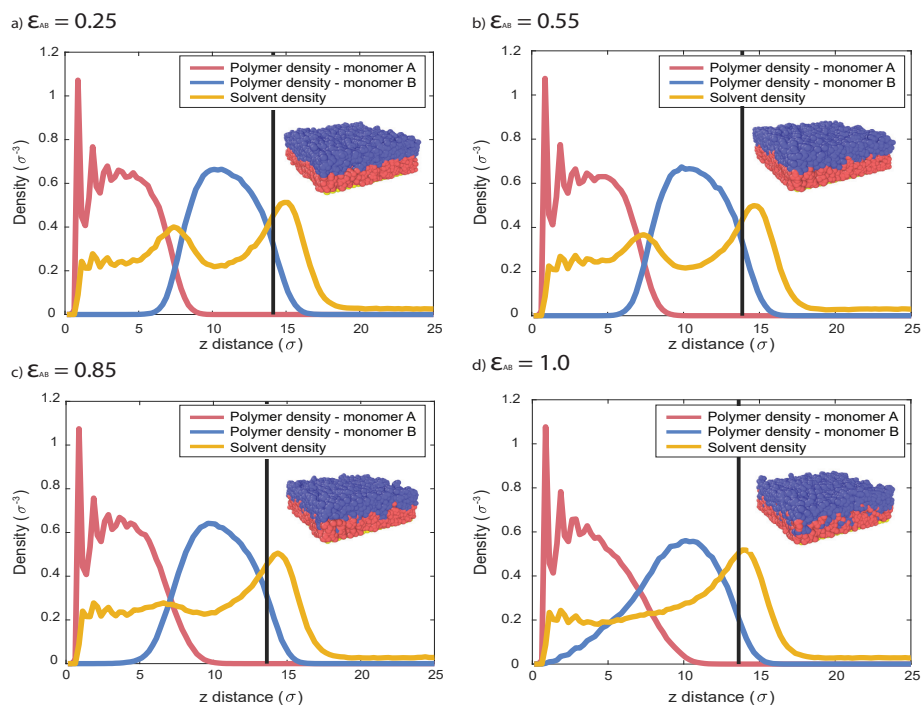

Figure SI 1: Monomer A (purple), monomer B (blue) and solvent (yellow) density profiles at different monomer cross-interaction strengths ( $\epsilon_{ab}$ ). At  $\epsilon_{ab} = 1$ , the peak correlated to excess solvent disappears due to the mixing of monomers (SI1d). In all simulations we keep  $\epsilon_{pp} = \epsilon_{ss} = \epsilon_{ps} = 1$ .

\*Email: [s.j.a.debeer@utwente.nl](mailto:s.j.a.debeer@utwente.nl)

## 2 Alternating brush

We perform additional simulations of an alternating brush (-A-B-A-B-) to investigate the enhanced sorption effect. Even though the alternating brush contains the most A-B interfacial contacts, it does not sorb considerably more vapor than a random brush. To show this, we plot solvent density profiles at  $\epsilon_{ab} = 0.4, 0.7$  and  $1.0$  of an alternating and random brush in Fig. SI 2. Qualitatively, solvent profiles are similar in shape and area. Quantitatively, the difference of solvent sorbed is  $0.6\%$  at  $\epsilon_{ab} = 0.4$ ,  $0.4\%$  at  $\epsilon_{ab} = 0.7$ , and  $0.5\%$  at  $\epsilon_{ab} = 1.0$ . These values are obtained by integrating the areas below the solvent profiles. Therefore, we conclude that there is a negligible difference in vapor sorption between an alternating and random brush.

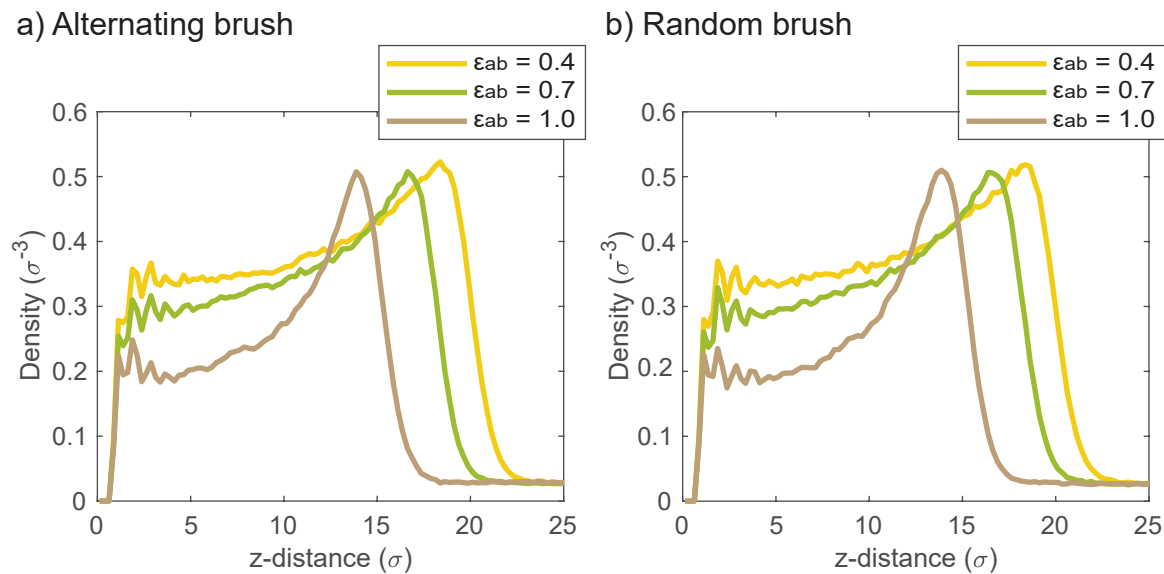

Figure SI 2: Solvent density profiles at different  $\epsilon_{ab}$  of a) an alternating brush, and b) a random brush. Other particle-particle interactions are kept constant ( $\epsilon_{pp} = \epsilon_{ps} = \epsilon_{ss} = 1$ ).

### 3 The same particle-particle interactions - the same polymer density profiles

We perform simulations of a pure homopolymer brush and a 2-block brush while maintaining all particle-particle interactions to be 1. When simulating a pure homopolymer brush this means:  $\epsilon_{pp} = \epsilon_{ps} = \epsilon_{ss} = 1$ . When simulating a 2-block brush, this means:  $\epsilon_{ab} = \epsilon_{pp} = \epsilon_{ps} = \epsilon_{ss} = 1$ . We observe that the pure brush density profile overlaps with the sum of 2-block brush density profile (sum polymer density A and polymer density B). The polymer density profiles are identical since the particle interactions are identical, as shown in Figure SI 3.

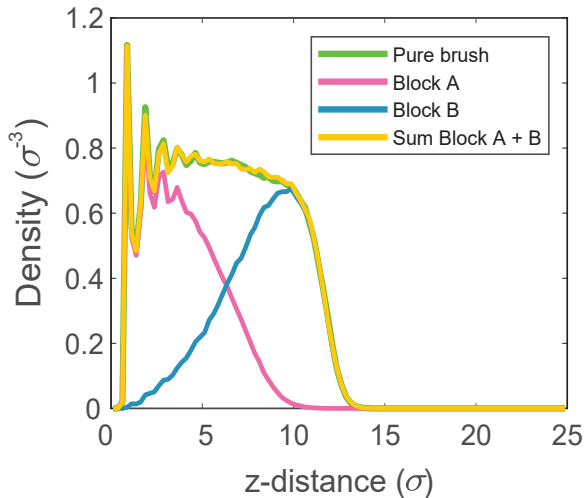

Figure SI 3: Polymer density profile of a pure homopolymer brush (green) and a sum of density profiles in a 2-block brush, A + B, shown in yellow. The profiles are identical since all particle-particle interactions are identical.  $\epsilon_{xx} = 1$
